# Supplementary material for: Access to Vaccination among Disadvantaged, Isolated and Difficult-to-Reach Communities in the WHO European Region: A Systematic Review
Source: MDPI journal article supplement (doi:10.3390/vaccines10071038), 2022-06-28
Supplement: s1 [file s1]

## Supplementary S1: OVID MEDLINE Search strategy.

Example of first search conducted in November 2020. The same terms were used in the updated search in March 2022

| <input type="checkbox"/> | # ▲ | Searches                                                                                                                                                                                                                                                                                                         |
|--------------------------|-----|------------------------------------------------------------------------------------------------------------------------------------------------------------------------------------------------------------------------------------------------------------------------------------------------------------------|
| <input type="checkbox"/> | 1   | exp Vaccines/                                                                                                                                                                                                                                                                                                    |
| <input type="checkbox"/> | 2   | exp Vaccination/                                                                                                                                                                                                                                                                                                 |
| <input type="checkbox"/> | 3   | exp Immunization/                                                                                                                                                                                                                                                                                                |
| <input type="checkbox"/> | 4   | exp Immunization Programs/                                                                                                                                                                                                                                                                                       |
| <input type="checkbox"/> | 5   | (vaccin* or immunis* or immuniz*).mp.                                                                                                                                                                                                                                                                            |
| <input type="checkbox"/> | 6   | 1 or 2 or 3 or 4 or 5                                                                                                                                                                                                                                                                                            |
| <input type="checkbox"/> | 7   | exp Vulnerable populations/                                                                                                                                                                                                                                                                                      |
| <input type="checkbox"/> | 8   | exp Ethnic Groups/                                                                                                                                                                                                                                                                                               |
| <input type="checkbox"/> | 9   | exp "Transients and Migrants"/                                                                                                                                                                                                                                                                                   |
| <input type="checkbox"/> | 10  | exp Refugees/                                                                                                                                                                                                                                                                                                    |
| <input type="checkbox"/> | 11  | (disadvantage* or vulnerable* or "ethnic minority" or migrant* or refugee* or asylum* or nomad* or squatter* or transient* or "risk group" or traveller* or gyps* or socioeconomic* or "socio economic").mp.                                                                                                     |
| <input type="checkbox"/> | 12  | ("non eu" or "non-europe").mp.                                                                                                                                                                                                                                                                                   |
| <input type="checkbox"/> | 13  | ((visit* or guest*) adj5 (work or employment or job or jobs)).mp.                                                                                                                                                                                                                                                |
| <input type="checkbox"/> | 14  | 7 or 8 or 9 or 10 or 11 or 12 or 13                                                                                                                                                                                                                                                                              |
| <input type="checkbox"/> | 15  | exp Europe/                                                                                                                                                                                                                                                                                                      |
| <input type="checkbox"/> | 16  | exp Albania/                                                                                                                                                                                                                                                                                                     |
| <input type="checkbox"/> | 17  | exp Andorra/                                                                                                                                                                                                                                                                                                     |
| <input type="checkbox"/> | 18  | exp Armenia/                                                                                                                                                                                                                                                                                                     |
| <input type="checkbox"/> | 19  | exp Austria/                                                                                                                                                                                                                                                                                                     |
| <input type="checkbox"/> | 20  | exp Azerbaijan/                                                                                                                                                                                                                                                                                                  |
| <input type="checkbox"/> | 21  | exp Belarus/                                                                                                                                                                                                                                                                                                     |
| <input type="checkbox"/> | 22  | exp Belgium/                                                                                                                                                                                                                                                                                                     |
| <input type="checkbox"/> | 23  | (Bosnia and Herzegovina).mp. [mp=title, abstract, original title, name of substance word, subject heading word, floating sub-heading word, keyword heading word, organism supplementary concept word, protocol supplementary concept word, rare disease supplementary concept word, unique identifier, synonyms] |
| <input type="checkbox"/> | 24  | exp Bulgaria/                                                                                                                                                                                                                                                                                                    |
| <input type="checkbox"/> | 25  | exp Croatia/                                                                                                                                                                                                                                                                                                     |
| <input type="checkbox"/> | 26  | exp Cyprus/                                                                                                                                                                                                                                                                                                      |
| <input type="checkbox"/> | 27  | exp Czech Republic/                                                                                                                                                                                                                                                                                              |
| <input type="checkbox"/> | 28  | exp Denmark/                                                                                                                                                                                                                                                                                                     |
| <input type="checkbox"/> | 29  | exp Estonia/                                                                                                                                                                                                                                                                                                     |
| <input type="checkbox"/> | 30  | exp Finland/                                                                                                                                                                                                                                                                                                     |
| <input type="checkbox"/> | 31  | exp France/                                                                                                                                                                                                                                                                                                      |
| <input type="checkbox"/> | 32  | exp "Georgia (republic)"/                                                                                                                                                                                                                                                                                        |
| <input type="checkbox"/> | 33  | exp Germany/                                                                                                                                                                                                                                                                                                     |

|                          |    |                                                                                                                                                                                                                                                                                                                                  |
|--------------------------|----|----------------------------------------------------------------------------------------------------------------------------------------------------------------------------------------------------------------------------------------------------------------------------------------------------------------------------------|
| <input type="checkbox"/> | 34 | exp Greece/                                                                                                                                                                                                                                                                                                                      |
| <input type="checkbox"/> | 35 | exp Hungary/                                                                                                                                                                                                                                                                                                                     |
| <input type="checkbox"/> | 36 | exp Iceland/                                                                                                                                                                                                                                                                                                                     |
| <input type="checkbox"/> | 37 | exp Ireland/                                                                                                                                                                                                                                                                                                                     |
| <input type="checkbox"/> | 38 | exp Israel/                                                                                                                                                                                                                                                                                                                      |
| <input type="checkbox"/> | 39 | exp Italy/                                                                                                                                                                                                                                                                                                                       |
| <input type="checkbox"/> | 40 | exp Kazakhstan/                                                                                                                                                                                                                                                                                                                  |
| <input type="checkbox"/> | 41 | exp Kyrgyzstan/                                                                                                                                                                                                                                                                                                                  |
| <input type="checkbox"/> | 42 | exp Latvia/                                                                                                                                                                                                                                                                                                                      |
| <input type="checkbox"/> | 43 | exp Lithuania/                                                                                                                                                                                                                                                                                                                   |
| <input type="checkbox"/> | 44 | exp Luxembourg/                                                                                                                                                                                                                                                                                                                  |
| <input type="checkbox"/> | 45 | exp Malta/                                                                                                                                                                                                                                                                                                                       |
| <input type="checkbox"/> | 46 | exp Monaco/                                                                                                                                                                                                                                                                                                                      |
| <input type="checkbox"/> | 47 | exp Montenegro/                                                                                                                                                                                                                                                                                                                  |
| <input type="checkbox"/> | 48 | exp Netherlands/                                                                                                                                                                                                                                                                                                                 |
| <input type="checkbox"/> | 49 | exp "Republic of North Macedonia"/                                                                                                                                                                                                                                                                                               |
| <input type="checkbox"/> | 50 | exp Norway/                                                                                                                                                                                                                                                                                                                      |
| <input type="checkbox"/> | 51 | exp Poland/                                                                                                                                                                                                                                                                                                                      |
| <input type="checkbox"/> | 52 | exp Portugal/                                                                                                                                                                                                                                                                                                                    |
| <input type="checkbox"/> | 53 | exp Moldova/                                                                                                                                                                                                                                                                                                                     |
| <input type="checkbox"/> | 54 | exp Romania/                                                                                                                                                                                                                                                                                                                     |
| <input type="checkbox"/> | 55 | exp Russia/                                                                                                                                                                                                                                                                                                                      |
| <input type="checkbox"/> | 56 | exp San Marino/                                                                                                                                                                                                                                                                                                                  |
| <input type="checkbox"/> | 57 | exp Serbia/                                                                                                                                                                                                                                                                                                                      |
| <input type="checkbox"/> | 58 | exp Slovakia/                                                                                                                                                                                                                                                                                                                    |
| <input type="checkbox"/> | 59 | exp Slovenia/                                                                                                                                                                                                                                                                                                                    |
| <input type="checkbox"/> | 60 | exp Spain/                                                                                                                                                                                                                                                                                                                       |
| <input type="checkbox"/> | 61 | exp Sweden/                                                                                                                                                                                                                                                                                                                      |
| <input type="checkbox"/> | 62 | exp Switzerland/                                                                                                                                                                                                                                                                                                                 |
| <input type="checkbox"/> | 63 | exp Tajikistan/                                                                                                                                                                                                                                                                                                                  |
| <input type="checkbox"/> | 64 | Turkey.mp.                                                                                                                                                                                                                                                                                                                       |
| <input type="checkbox"/> | 65 | exp Turkmenistan/                                                                                                                                                                                                                                                                                                                |
| <input type="checkbox"/> | 66 | exp Ukraine/                                                                                                                                                                                                                                                                                                                     |
| <input type="checkbox"/> | 67 | ("United Kingdom" or UK or "Great Britain" or Britain or "Northern Ireland" or England or Scotland or Wales).mp.                                                                                                                                                                                                                 |
| <input type="checkbox"/> | 68 | exp Uzbekistan/                                                                                                                                                                                                                                                                                                                  |
| <input type="checkbox"/> | 69 | 15 or 16 or 17 or 18 or 19 or 20 or 21 or 22 or 23 or 24 or 25 or 26 or 27 or 28 or 29 or 30 or 31 or 32 or 33 or 34 or 35 or 36 or 37 or 38 or 39 or 40 or 41 or 42 or 43 or 44 or 45 or 46 or 47 or 48 or 49 or 50 or 51 or 52 or 53 or 54 or 55 or 56 or 57 or 58 or 59 or 60 or 61 or 62 or 63 or 64 or 65 or 66 or 67 or 68 |
| <input type="checkbox"/> | 70 | 6 and 14 and 69                                                                                                                                                                                                                                                                                                                  |
| <input type="checkbox"/> | 71 | limit 70 to yr="2015 - 2020"                                                                                                                                                                                                                                                                                                     |
